# Supplementary material
Source: PubMed Central journal article supplement (PMC5538722)

### DF 3457 Serum

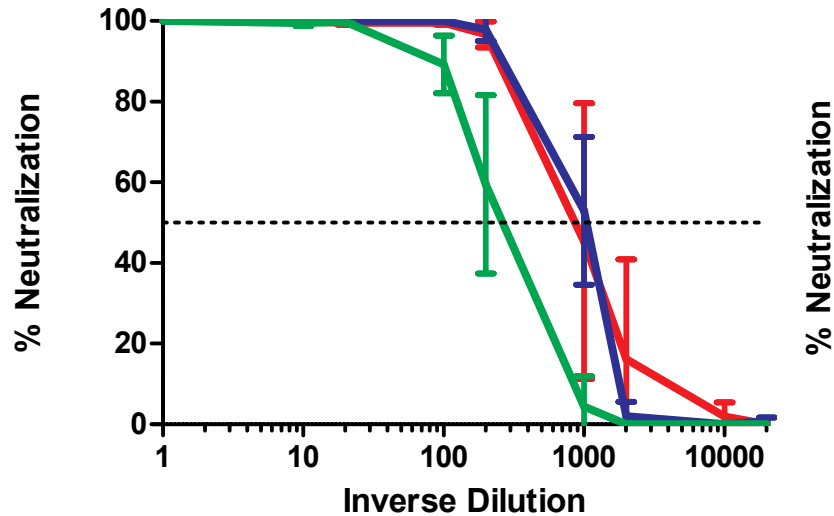

### Endemic Plasma

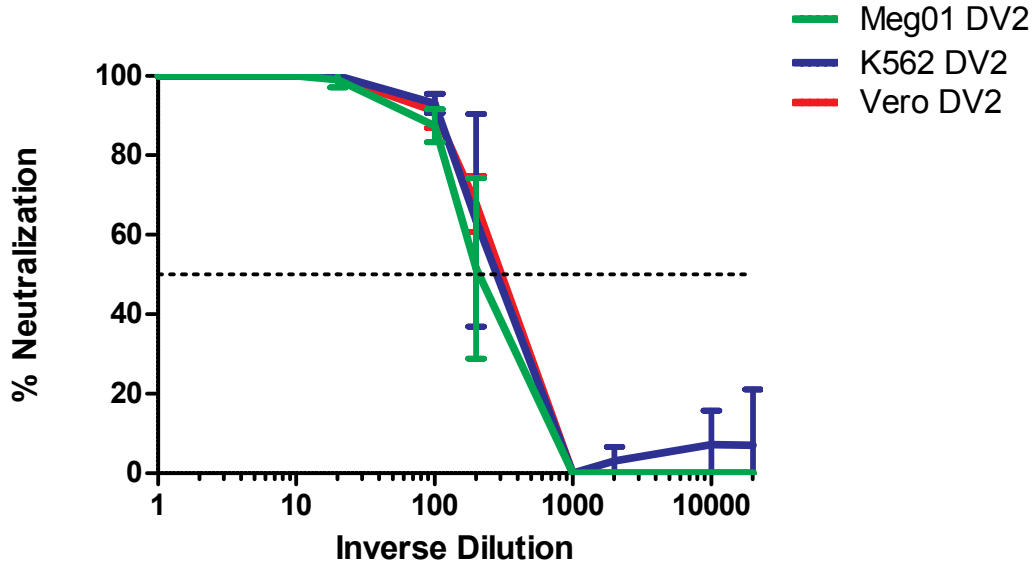

- Meg01 DV2
- K562 DV2
- Vero DV2

Supplement: NIHMS855240-supplement-Supplementary_Figure.pdf [file NIHMS855240-supplement-Supplementary_Figure.pdf]
